# Supplementary material for: The Clinical Efficacy of Different Relaxation Exercises on Intraocular Pressure Reduction: A Meta-Analysis
Source: MDPI journal article supplement (doi:10.3390/jcm13092591), 2024-04-28
Supplement: s1 [file s1]

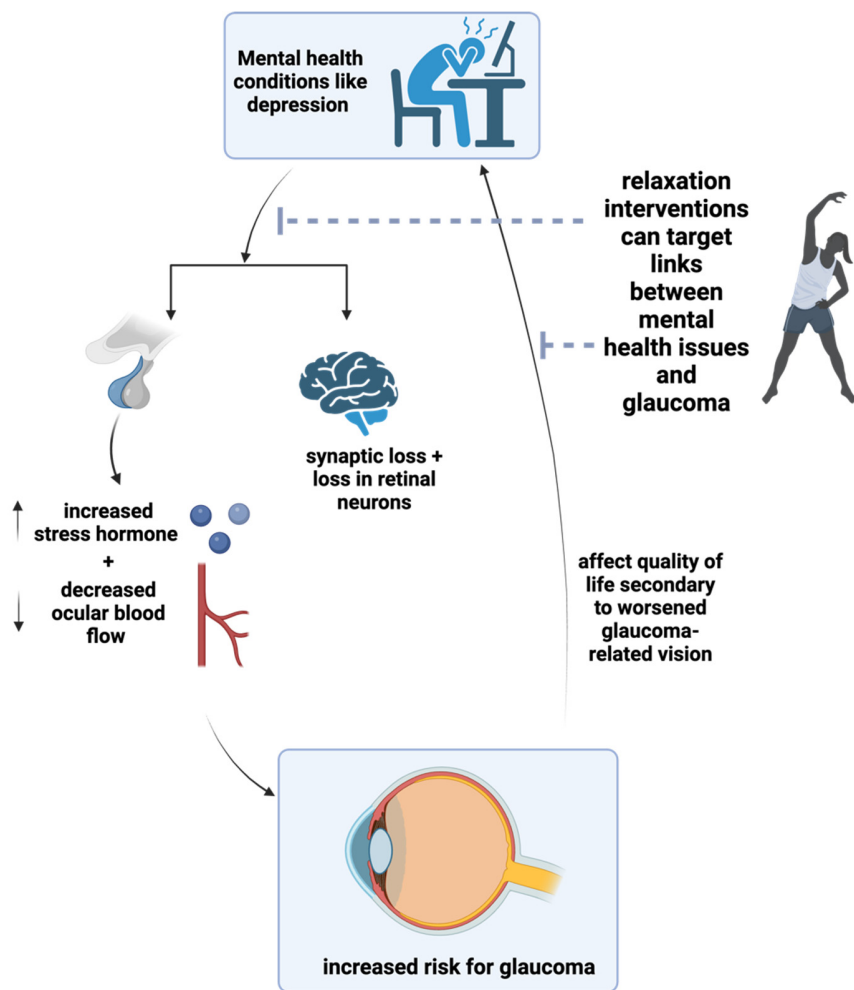

**Supplementary Figure S1.** Proposed pathophysiology between mental health conditions and glaucoma.

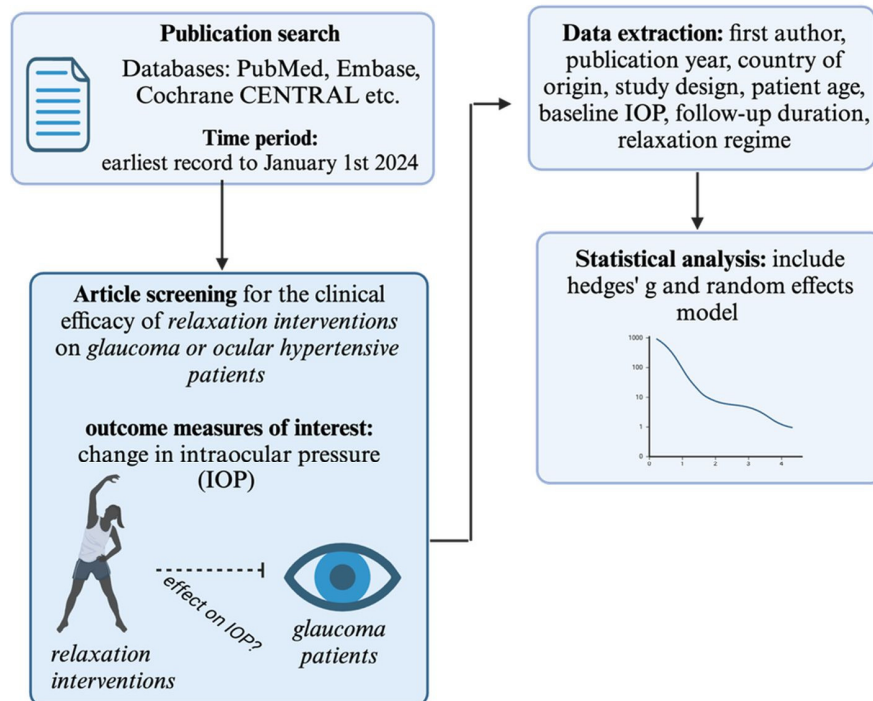

**Supplementary Figure S2.** Overview of study design.

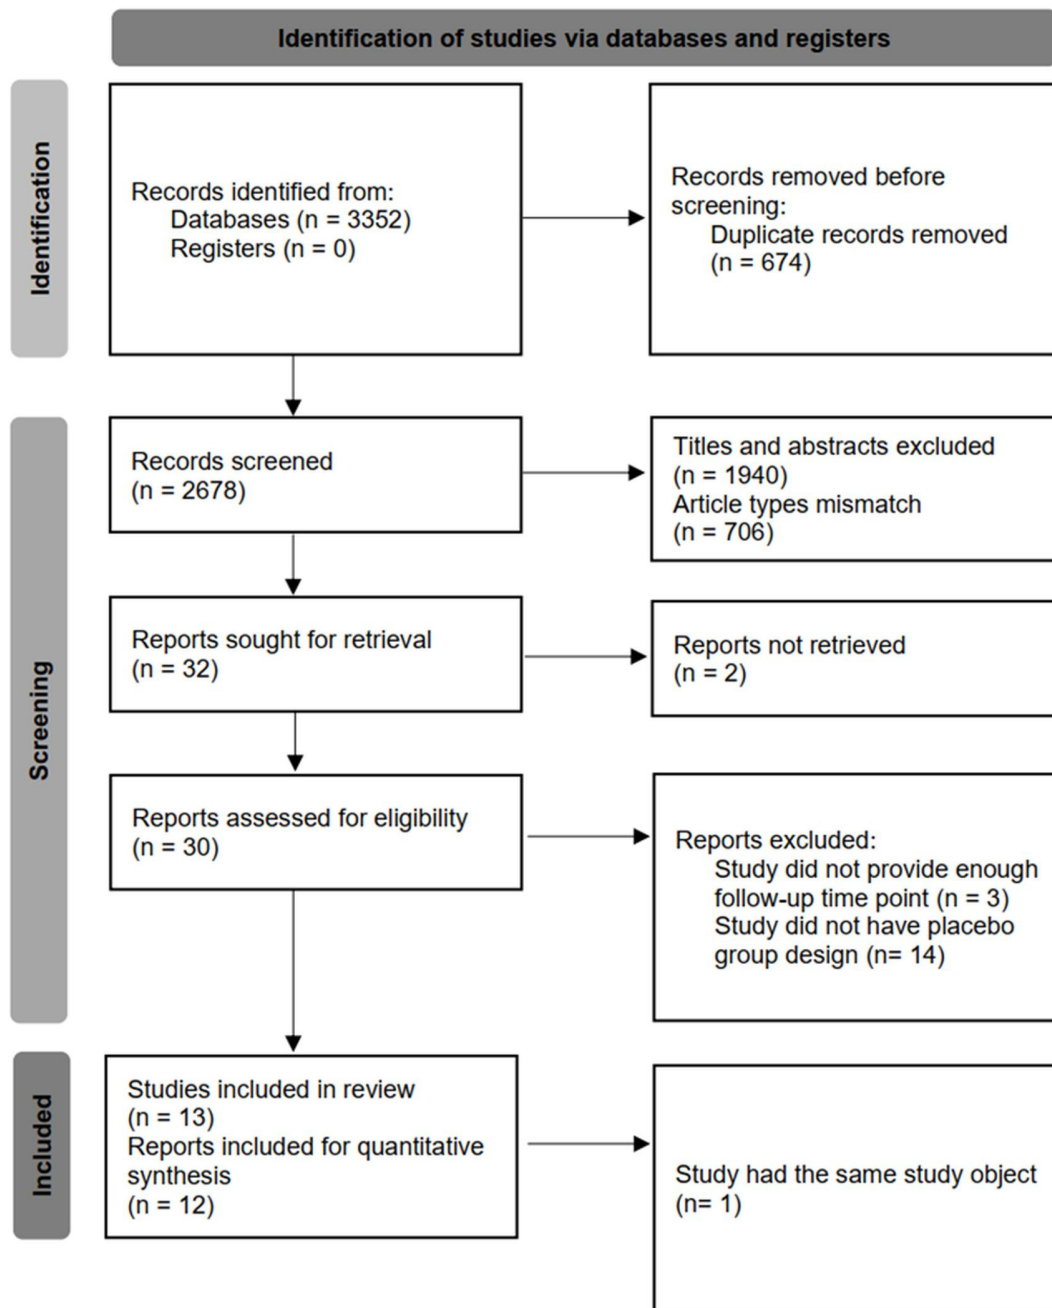

**Supplementary Figure S3.** PRISMA flow diagram literature search and study selection.

|       |              | Risk of bias domains |              |              |              |              |              |
|-------|--------------|----------------------|--------------|--------------|--------------|--------------|--------------|
|       |              | D1                   | D2           | D3           | D4           | D5           | Overall      |
| Study | Kaluza 1995  | <div>-</div>         | <div>-</div> | <div>+</div> | <div>+</div> | <div>+</div> | <div>X</div> |
|       | Kaluza 1996  | <div>-</div>         | <div>-</div> | <div>+</div> | <div>+</div> | <div>+</div> | <div>X</div> |
|       | Dada 2018    | <div>+</div>         | <div>+</div> | <div>+</div> | <div>+</div> | <div>+</div> | <div>+</div> |
|       | Gagrani 2018 | <div>+</div>         | <div>+</div> | <div>+</div> | <div>+</div> | <div>+</div> | <div>+</div> |
|       | Gupta 2019   | <div>-</div>         | <div>+</div> | <div>+</div> | <div>+</div> | <div>+</div> | <div>-</div> |
|       | Dada 2021a   | <div>+</div>         | <div>+</div> | <div>+</div> | <div>+</div> | <div>+</div> | <div>+</div> |
|       | Dada 2021b   | <div>+</div>         | <div>+</div> | <div>+</div> | <div>+</div> | <div>+</div> | <div>+</div> |
|       | Udenia 2021  | <div>+</div>         | <div>+</div> | <div>+</div> | <div>+</div> | <div>+</div> | <div>+</div> |
|       | Dada 2022    | <div>+</div>         | <div>-</div> | <div>+</div> | <div>+</div> | <div>+</div> | <div>-</div> |
|       | Ismail 2022  | <div>+</div>         | <div>+</div> | <div>+</div> | <div>+</div> | <div>+</div> | <div>+</div> |
|       | Sankalp 2022 | <div>+</div>         | <div>-</div> | <div>+</div> | <div>+</div> | <div>+</div> | <div>-</div> |
|       | Ismail 2023  | <div>+</div>         | <div>+</div> | <div>+</div> | <div>+</div> | <div>+</div> | <div>+</div> |
|       | Dada 2024    | <div>+</div>         | <div>+</div> | <div>+</div> | <div>+</div> | <div>+</div> | <div>+</div> |

Domains:

D1: Bias arising from the randomization process.

D2: Bias due to deviations from intended intervention.

D3: Bias due to missing outcome data.

D4: Bias in measurement of the outcome.

D5: Bias in selection of the reported result.

Judgement

X High

- Some concerns

+ Low

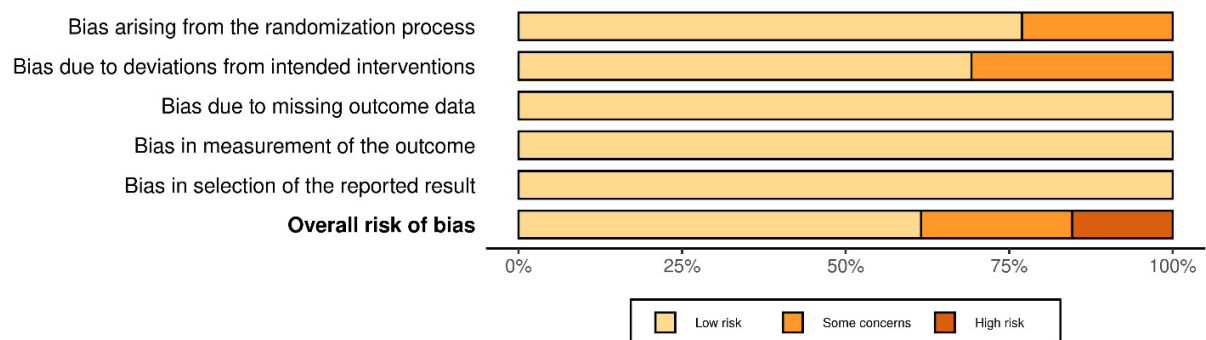

**Supplementary Figure S4.** Risk of bias summary for each study based on the Cochrane bias assessment tool.

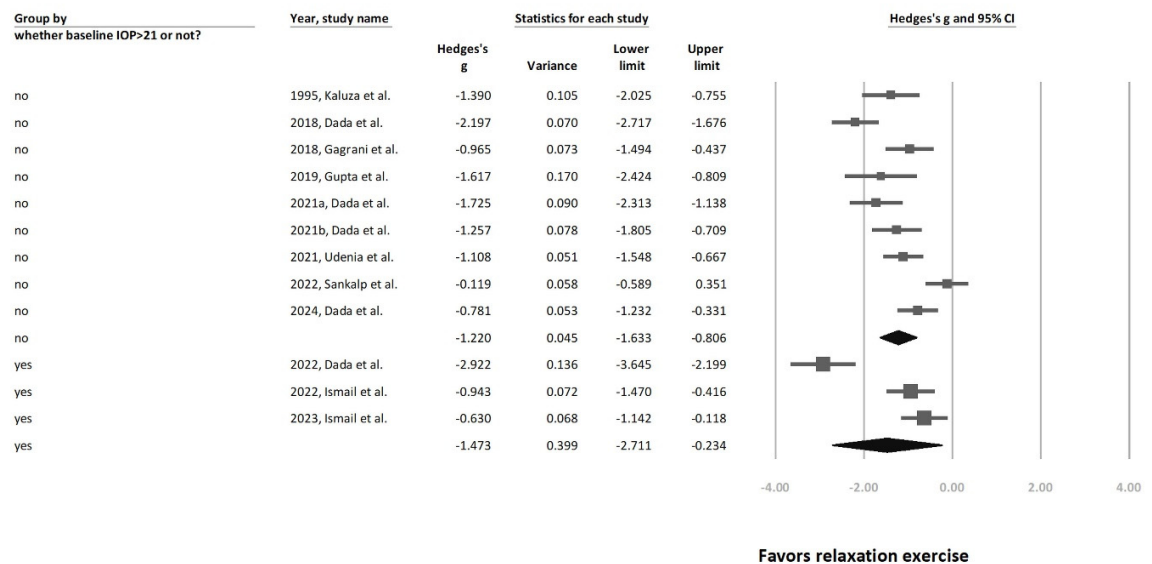

**Supplementary Figure S5.** Forest plot presenting subgroup analysis based on the baseline IOPs.

The baseline IOPs were divided into over or less than 21 mmHg.

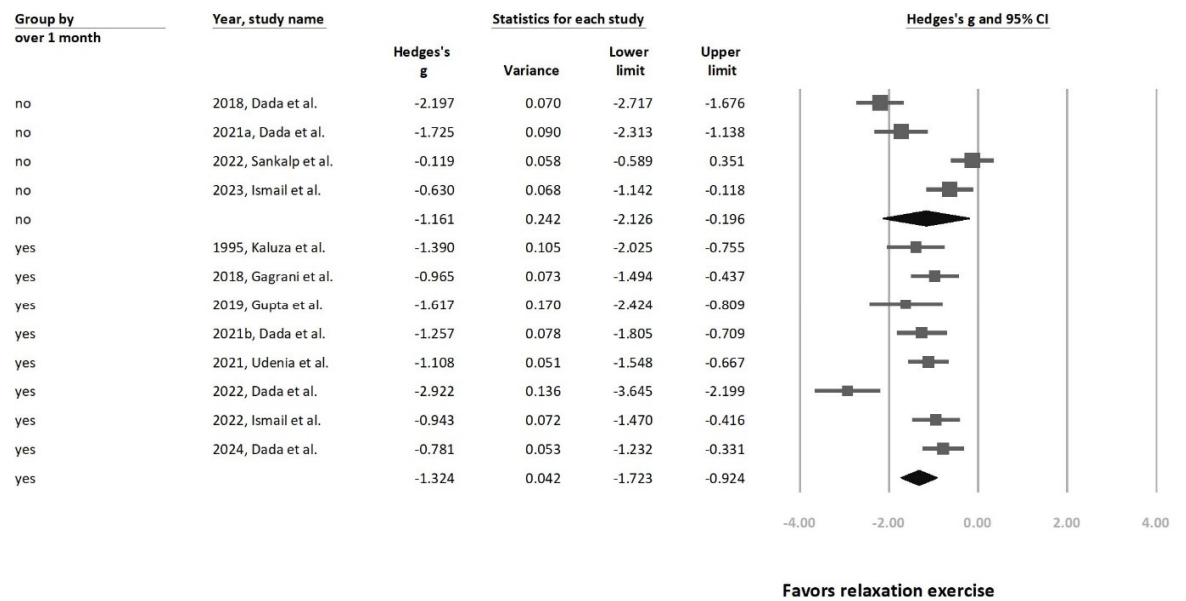

**Supplementary Figure S6.** Forest plot presenting subgroup analysis based on the follow-up time points. The follow-up time points were divided into over or less than one-month interval.

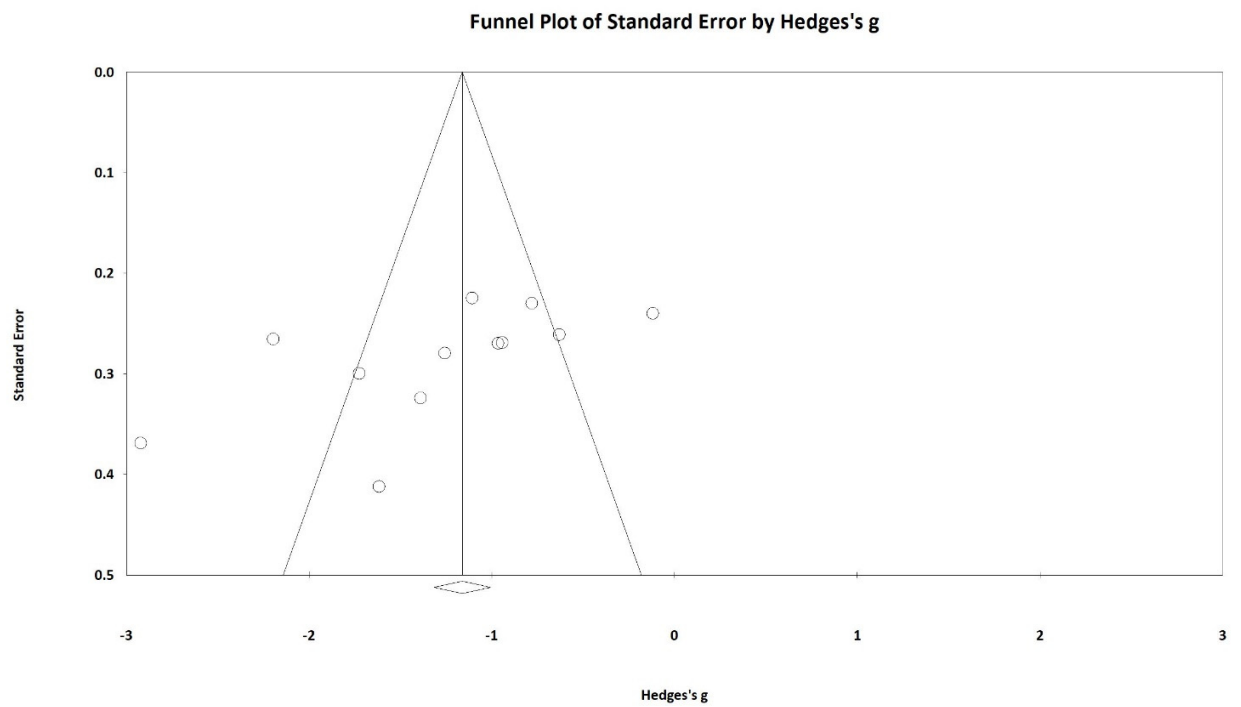

**Supplementary Figure S7.** Funnel plot of included studies based on Hedges' g before and after relaxation exercise.
